# Supplementary material
Source: PubMed Central journal article supplement (PMC4105240)
Supplement: 1400706_JI_1400706_Supplemental_Material_1.pdf [file 1400706_JI_1400706_Supplemental_Material_1.pdf]

## Supplemental Figure 1

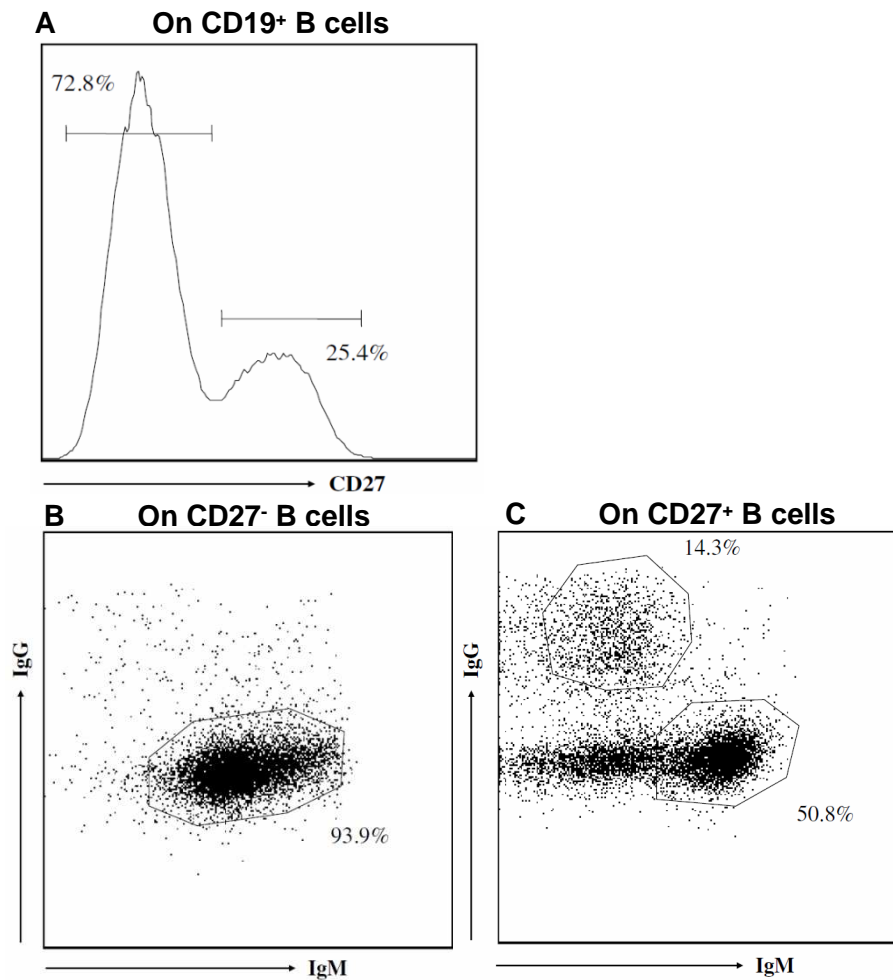

**Supplemental Figure 1: Representative CD27<sup>-</sup>IgM<sup>+</sup>, CD27<sup>+</sup>IgM<sup>+</sup> and CD27<sup>+</sup>IgG<sup>+</sup> B cells sorting.** A) Gating strategy for the flow cytometric isolation of CD27<sup>-</sup> and CD27<sup>+</sup> PB B cells. B) Dot plots indicate the sizes of CD27<sup>-</sup>IgM<sup>+</sup> B cells and C) CD27<sup>+</sup>IgM<sup>+</sup> and CD27<sup>+</sup>IgG<sup>+</sup> B-cell subsets sorted for the limiting dilution studies. Gates show percentages of CD27<sup>-</sup>IgM<sup>+</sup> (B), CD27<sup>+</sup>IgM<sup>+</sup> and CD27<sup>+</sup>IgG<sup>+</sup> B cells (C).

## Supplemental Figure 2

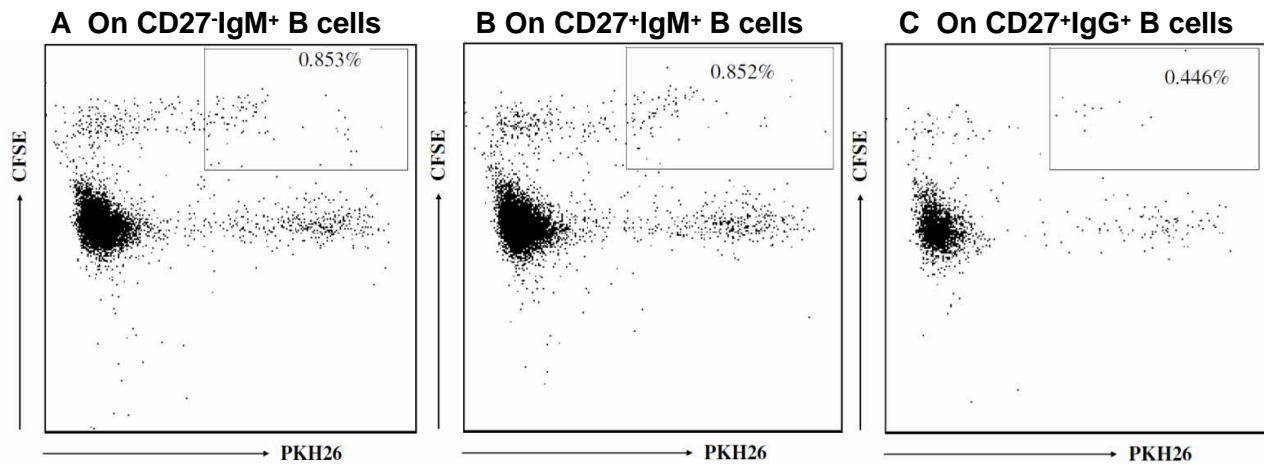

**Supplemental Figure 2: Gating strategy for anti-D-specific PB B cells.** R<sub>2</sub>R<sub>2</sub> RhD<sup>+</sup> red blood cells (RBCs) were stained with either red-fluorescent PKH26 or green-fluorescent CFSE membrane dyes and then incubated with PB B cells. Gates show percentages of double positive dots representing anti-D-specific CD27-IgM<sup>+</sup> (A), CD27<sup>+</sup>IgM<sup>+</sup> (B) and CD27<sup>+</sup>IgG<sup>+</sup> (C) B cells isolated from the hyperimmunized RhD-4 anti-D donor.

**Supplemental Table 1: Reverse primer sequences for nested Ig-PCR on RACE products and Forward (F), Reverse (R) and extra reverse (S) primer sequences for nested BCL6-PCR**

|                       |                                   |
|-----------------------|-----------------------------------|
| R1-C <sub>γ</sub> 1-4 | 5'-TGTCCACCTTGGTGTGCTGGGCT-3'     |
| R1-C <sub>μ</sub>     | 5'-CACTGGAAGAGGCACGTTCTTTTCT-3'   |
| R1-C <sub>κ</sub>     | 5'-ACACTCTCCCCTGTTGAAGCTCTTTG-3'  |
| R1-C <sub>λ</sub>     | 5'-TGAACATTCTGTAGGGGCCACTGTCTT-3' |
| R2-C <sub>γ</sub> 1-4 | 5'-TTCGGGGAAGTAGTCCTTGACCAG-3'    |
| R2-C <sub>μ</sub>     | 5'-GGAATTCTCACAGGAGACGAGGG-3'     |
| R2-C <sub>κ</sub>     | 5'-CAGATTTCAACTGCTCATCAGATGGC-3'  |
| R2-C <sub>λ</sub>     | 5'-CACCAGTGTGGCCTTGTTGGCTTG-3'    |
| BCL6-1F               | 5'-GCCGGACACCAGGTGATTATT-3'       |
| BCL6-1R               | 5'-CTCTCATTAGGAAGATCACGGC-3'      |
| BCL6-2F               | 5'-AATGCTTTGGCTCCAAGTTTTC-3'      |
| BCL6-2R               | 5'-TAGACACGATACTTCATCTCATCTG-3'   |
| BCL6-S                | 5'-CAAGGAAAGCAGTTTGCAAGC-3'       |
